# Supplementary material for: Efficacy of Two Commercially Available Adsorbents to Reduce the Combined Toxic Effects of Dietary Aflatoxins, Fumonisins, and Zearalenone and Their Residues in the Tissues of Weaned Pigs
Source: MDPI journal article supplement (doi:10.3390/toxins15110629), 2023-10-27
Supplement: s1 [file s1]

## Supplementary Material

1. Take 1 g of a homogenized tissue (cut into pieces) sample and combine it with 200  $\mu\text{L}$  of isotopic standard working solution;
2. Add 10 mL of acetonitrile/water/acetic acid (79:20:1, v/v/v);
3. Add 4.0 g anhydrous sodium sulfate and 1.5 g of anhydrous sodium acetate in a plastic tube (50 mL), and blend in a in ultra-turrax blender (IKA, T10) until completely dissolved;
4. Centrifuge at 5,000 rpm for 8 min;
5. Separate the supernatant and transfer it to another tube (50 mL);
6. Add 5 mL of hexane and vortex the mixture for 2 min;
7. Keep the mixture under dark for 5 min BEFORE hexane phase (upper phase) removal & discard;
8. Separate and transfer the acetonitrile phase into a glass tube following evaporation under flowing nitrogen gas ( $50 \pm 5$  °C) in a MultiVap 54 (LabTech) concentrator;
9. Redissolve the remaining dry residue in 0.5 mL of acetonitrile/water (10:90, v/v);
10. Vortex (30 s) the extract, filter through a 0.22  $\mu\text{m}$  syringe filter and transfer the volume into an autosampler vial with an insert;
11. Submit a 5  $\mu\text{L}$  aliquot to LC-MS/MS analysis.

**Figure S1.** Analytical steps for extraction of mycotoxin residues from samples of liver and kidneys.

**Table S1.** Analytical parameters of the analytical method for determination of residual mycotoxins in liver and kidneys.

| Mycotoxin                                          | RT<br>(min.) | Mass<br>(g/mol) | Molecular<br>ion   | Transition<br>( <i>m/z</i> )                             | Calibration<br>range (µg/kg) | LOD<br>(µg/kg) | LOQ<br>(µg/kg) |
|----------------------------------------------------|--------------|-----------------|--------------------|----------------------------------------------------------|------------------------------|----------------|----------------|
| AFM <sub>1</sub>                                   | 1.13         | 328.3           | [M+H] <sup>+</sup> | 329.0 > 273.1 <sup>a</sup><br>329.0 > 229.0 <sup>b</sup> | 0.1-100                      | 0.2            | 0.7            |
| AFB <sub>1</sub>                                   | 1.25         | 312.3           | [M+H] <sup>+</sup> | 312.7 > 284.9 <sup>a</sup><br>312.7 > 241.1 <sup>b</sup> | 0.1-100                      | 0.1            | 0.3            |
| [ <sup>13</sup> C <sub>17</sub> ]-AFB <sub>1</sub> | 1.25         | 329.1           | [M+H] <sup>+</sup> | 330.3 > 301.5                                            | 0.1-100                      | 0.1            | 0.4            |
| AFB <sub>2</sub>                                   | 1.15         | 314.3           | [M+H] <sup>+</sup> | 314.7 > 259.0 <sup>a</sup><br>314.7 > 287.0 <sup>b</sup> |                              |                |                |
| AFG <sub>1</sub>                                   | 1.18         | 328.3           | [M+H] <sup>+</sup> | 328.9 > 243.0 <sup>a</sup><br>328.9 > 199.5 <sup>b</sup> | 0.1-100                      | 0.2            | 0.6            |
| AFG <sub>2</sub>                                   | 1.16         | 330.3           | [M+H] <sup>+</sup> | 330.9 > 245.0 <sup>a</sup><br>330.9 > 188.9 <sup>b</sup> | 0.1-100                      | 0.2            | 0.8            |
| [ <sup>13</sup> C <sub>34</sub> ]-FB <sub>1</sub>  | 5.40         | 755.6           | [M+H] <sup>+</sup> | 756.6 > 374.4                                            | 0.5-100                      | 0.3            | 1.0            |
| FB <sub>1</sub>                                    | 5.40         | 721.8           | [M+H] <sup>+</sup> | 722.5 > 334.0 <sup>a</sup><br>722.5 > 352.1 <sup>b</sup> |                              |                |                |
| FB <sub>2</sub>                                    | 5.76         | 705.8           | [M+H] <sup>+</sup> | 706.5 > 336.2 <sup>a</sup><br>706.5 > 318.3 <sup>b</sup> | 0.5-100                      | 0.4            | 1.0            |
| [ <sup>13</sup> C <sub>18</sub> ]-ZEN              | 6.03         | 336.2           | [M-H] <sup>-</sup> | 335.1 > 185.1                                            | 1.0-100                      | 1.0            | 3.0            |
| ZEN                                                | 6.03         | 318.1           | [M-H] <sup>-</sup> | 317.1 > 175.1 <sup>a</sup><br>317.1 > 130.9 <sup>b</sup> |                              |                |                |
| α-ZEL                                              | 5.81         | 320.2           | [M-H] <sup>-</sup> | 319.1 > 275.2 <sup>a</sup><br>319.1 > 160.2 <sup>b</sup> | 1.0-100                      | 0.8            | 2.6            |
| β-ZEL                                              | 5.83         | 320.2           | [M-H] <sup>-</sup> | 319.1 > 275.2 <sup>a</sup><br>319.1 > 160.2 <sup>b</sup> | 1.0-100                      | 0.6            | 2.0            |

RT: Retention time; LOD: Limit of detection; LOQ: Limit of quantification; AF: aflatoxin; FB: fumonisin; ZEN: zearalenone; α-ZEL: α-zearalenol; β-ZEL: β-zearalenol.

<sup>a</sup> Transitions used in the quantification.

<sup>b</sup> Transitions used in the confirmation.
